# Supplementary material for: Along the gut-bone marrow signaling pathway: use of longan polysaccharides to regenerate blood cells after chemotherapy-induced myelosuppression
Source: Royal Society of Chemistry journal article supplement (doi:10.1039/d4fo03758h), 2024-01-01
Supplement: d4fo03758h1.pdf [file d4fo03758h1.pdf]

## Supplementary Information

# Along the gut-bone marrow signaling pathway: Use of longan polysaccharides to regenerate blood cell after chemotherapy-induced myelosuppression

Shiai Zeng<sup>1</sup>, Kai Wang<sup>1,2</sup>, Lan Gao<sup>1</sup>, Xuwei Liu<sup>1</sup>, Zhuoyan Hu<sup>1,2</sup>, Lei Zhao<sup>1,2\*</sup>

<sup>1</sup> Guangdong Provincial Key Laboratory of Food Quality and Safety, South China Agricultural University,

Guangzhou 510642, P.R.China

<sup>2</sup> Guangdong Laboratory for Lingnan Modern Agricultural, Guangzhou 510642, P.R.China.

**\*Corresponding Author:**

Tel: +86-20-85280295, Email: [scauzl@scau.edu.cn](mailto:scauzl@scau.edu.cn) (L. Zhao)

Table S1 Metacyc pathway annotation

| Name                      | Microbial metabolic pathway                                                        |
|---------------------------|------------------------------------------------------------------------------------|
| PWY-7208                  | superpathway of pyrimidine nucleobases salvage                                     |
| NONOXIPENT-PWY            | pentose phosphate pathway (non-oxidative branch)                                   |
| PWY-7219                  | adenosine ribonucleotides de novo biosynthesis                                     |
| PWY-7111                  | pyruvate fermentation to isobutanol (engineered)                                   |
| PWY-5101                  | L-isoleucine biosynthesis II                                                       |
| PWY0-1319                 | CDP-diacylglycerol biosynthesis II                                                 |
| PWY-5667                  | CDP-diacylglycerol biosynthesis I                                                  |
| PWY-7229                  | superpathway of adenosine nucleotides de novo biosynthesis I                       |
| PWY-3781                  | aerobic respiration I (cytochrome c)                                               |
| PWY-6122                  | 5-aminoimidazole ribonucleotide biosynthesis II                                    |
| PWY-6277                  | superpathway of 5-aminoimidazole ribonucleotide biosynthesis                       |
| PWY-6121                  | 5-aminoimidazole ribonucleotide biosynthesis I                                     |
| ANAGLYCOLYSIS-PWY         | glycolysis III (from glucose)                                                      |
| PWY-5686                  | UMP biosynthesis                                                                   |
| ILEUSYN-PWY               | L-isoleucine biosynthesis I (from threonine)                                       |
| VALSYN-PWY                | L-valine biosynthesis                                                              |
| PWY-7221                  | guanosine ribonucleotides de novo biosynthesis                                     |
| GLYCOLYSIS                | glycolysis I (from glucose 6-phosphate)                                            |
| PWY-5484                  | glycolysis II (from fructose 6-phosphate)                                          |
| PWY-6387                  | UDP-N-acetylmuramoyl-pentapeptide biosynthesis I (meso-diaminopimelate containing) |
| PWY-2942                  | L-lysine biosynthesis III                                                          |
| PHOSLIPSYN-PWY            | superpathway of phospholipid biosynthesis I (bacteria)                             |
| CALVIN-PWY                | Calvin-Benson-Bassham cycle                                                        |
| PWY-6386                  | UDP-N-acetylmuramoyl-pentapeptide biosynthesis II (lysine-containing)              |
| PWY-6126                  | superpathway of adenosine nucleotides de novo biosynthesis II                      |
| PEPTIDOGLYCANSYN-PWY      | peptidoglycan biosynthesis I (meso-diaminopimelate containing)                     |
| PWY-6385                  | peptidoglycan biosynthesis III (mycobacteria)                                      |
| PWY-7663                  | gondoate biosynthesis (anaerobic)                                                  |
| PWY-5100                  | pyruvate fermentation to acetate and lactate II                                    |
| BRANCHED-CHAIN-AA-SYN-PWY | superpathway of branched amino acid biosynthesis                                   |
| ANAEROFrucAT-PWY          | homolactic fermentation                                                            |
| PWY4FS-7                  | phosphatidylglycerol biosynthesis I (plastidic)                                    |
| PWY4FS-8                  | phosphatidylglycerol biosynthesis II (non-plastidic)                               |
| PWY-5973                  | cis-vaccenate biosynthesis                                                         |
| GLUCONEO-PWY              | gluconeogenesis I                                                                  |
| PWY-6123                  | inosine-5'-phosphate biosynthesis I                                                |
| PWY-5097                  | L-lysine biosynthesis VI                                                           |
| PWY-7222                  | guanosine deoxyribonucleotides de novo biosynthesis II                             |
| PWY-7220                  | adenosine deoxyribonucleotides de novo biosynthesis II                             |

---

|                   |                                                                    |
|-------------------|--------------------------------------------------------------------|
| PWY-3001          | superpathway of L-isoleucine biosynthesis I                        |
| PWY-841           | superpathway of purine nucleotides de novo<br>biosynthesis I       |
| TRNA-CHARGING-PWY | tRNA charging                                                      |
| PWY-5103          | L-isoleucine biosynthesis III                                      |
| COA-PWY           | coenzyme A biosynthesis I                                          |
| PWY0-162          | superpathway of pyrimidine ribonucleotides de novo<br>biosynthesis |
| THRESYN-PWY       | superpathway of L-threonine biosynthesis                           |
| DENOVOPURINE2-PWY | superpathway of purine nucleotides de novo<br>biosynthesis II      |
| PWY-5104          | L-isoleucine biosynthesis IV                                       |
| PWY-6609          | adenine and adenosine salvage III                                  |
| PWY-7228          | superpathway of guanosine nucleotides de novo<br>biosynthesis I    |

---
